13. Lai HY, Chen IH, Chen A, Hwang FY, Lee Y: The use of the GlideScope for tracheal intubations in patients with ankylosing spondylitis. *Br J Anaesth* 2006; 97:419-22
14. Cooper RM: Use of a new videolaryngoscope (GlideScope) in the management of a difficult airway. *Can J Anaesth* 2003; 50:611-3
15. Lim TJ, Lim Y, Liu EHC: Evaluation of ease of intubation with the GlideScope or Macintosh laryngoscope by anaesthetists in simulated easy and difficult laryngoscopy. *Anaesthesia* 2005; 60:180-3
16. Lim Y, Lim TJ, Liu EHC: Ease of intubation with the GlideScope or Macintosh laryngoscope by inexperienced operators in simulated difficult airways. *Can J Anaesth* 2004; 51:641-2
17. Mallampati SR, Gatt SP, Gugino LD, Desai SP, Waraksa B, Freiburger D, Liu PL: A clinical sign to predict difficult tracheal intubation: A prospective study. *Can Anaesth Soc J* 1985; 32:429-34
18. Cormack RS, Lehane J: Difficult tracheal intubation in obstetrics: *Anaesthesia* 1984; 39:1105-11
19. Clopper CJ, Pearson ES: The use of confidence or fiducial limits illustrated in the case of the binomial. *Biometrika* 1934; 26:404-13
20. Wackett A, Anderson K, Thode H: Bullard laryngoscopy by naïve operators in the cervical spine immobilized patient. *J Emerg Med* 2005; 29:253-7
21. Maharaj CH, Higgins BD, Harte BH, Laffey JG: Evaluation of intubation using the Airtraq or Macintosh laryngoscope by anaesthetists in easy and simulated difficult laryngoscopy - a manikin study. *Anaesthesia* 2006; 61: 469-77

## ■ ANESTHESIOLOGY REFLECTIONS

### Alexander "Bazooka" Insufflator

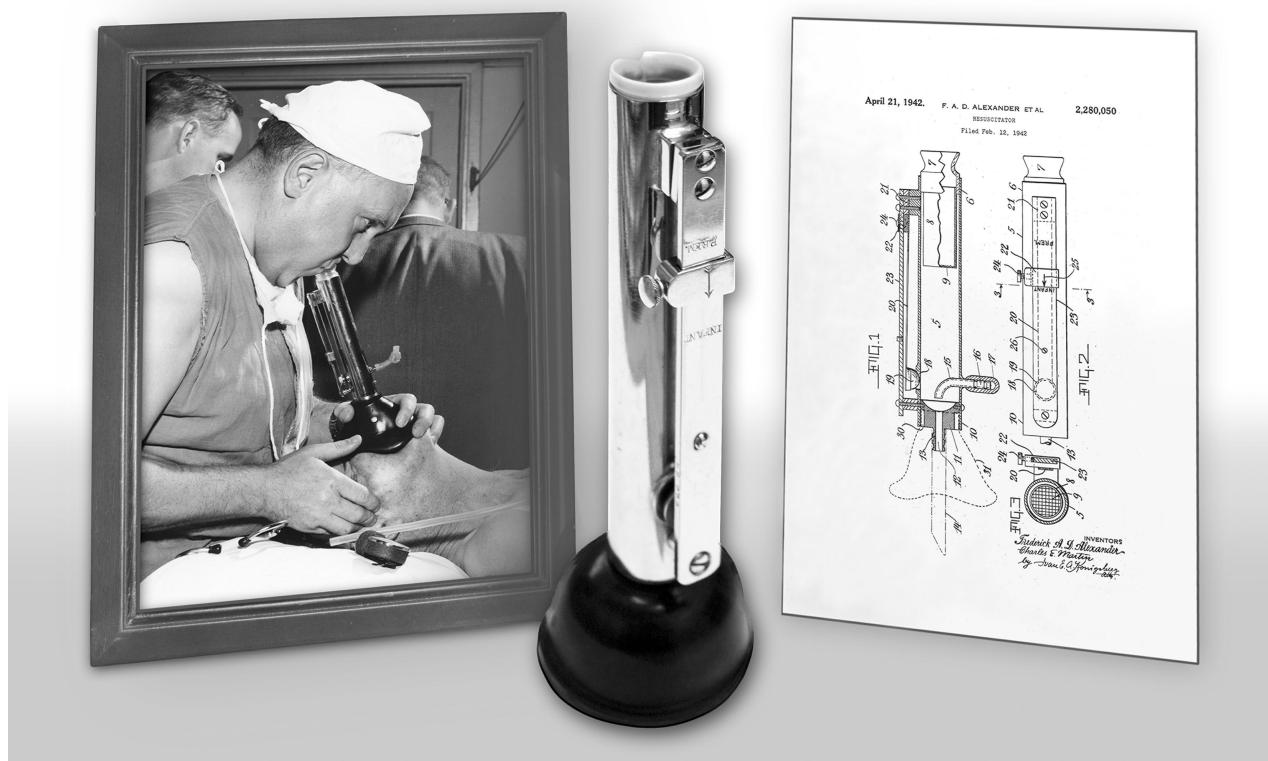

Born and educated in Ontario, Canada, F. A. Duncan Alexander, M.D. (1908–1983), trained under Drs. Ralph Waters and Emory Rovenstine before directing anesthesia services at New York's Albany Hospital. There in 1942, Alexander (pictured) and colleague Charles Martin received a US patent less than 3 months after filing for their "Bazooka" exhaled-air resuscitator. As sold for \$35 by Foregger, the "Alexander Mouth to Mouth Insufflator" featured a gauze-filtered mouthpiece for the rescuer, a nipple for supplementary oxygen, and both a sliding relief valve and a mask adaptor for safely adjusting "PREM[ature]," "INFANT," or adult inspiratory pressures and mask fit. Alexander served as American Society of Anesthesiologists (ASA) vice-president before joining the US Army Air Corps in 1942 and pioneering thoracic anesthesia techniques at evacuation hospitals in wartime England. After World War II, Alexander served his fellow war veterans back in Texas and was hailed by Dr. John Bonica as an independent founder in 1947 of multidisciplinary pain management. (Courtesy of the F. A. Duncan Alexander Collection, WLM Archives Collection No. MMS 51. This image appears in the *Anesthesiology Reflections* online collection available at [www.anesthesiology.org](http://www.anesthesiology.org).)

George S. Bause, M.D., M.P.H., Honorary Curator, ASA's Wood Library-Museum of Anesthesiology, Park Ridge, Illinois, and Clinical Associate Professor, Case Western Reserve University, Cleveland, Ohio. [UJYC@aol.com](mailto:UJYC@aol.com).
